# Supplementary material for: Gut versorgt nach Sectio
Source: Springer Nature journal article supplement (doi:10.1007/s43877-022-0724-7), 2023-01-01
Supplement: MOESM1 [file 23905348]

## Tabelle 1

zum Beitrag „Wundkontrolle, Wundheilung & Wundpflege“

von Bianca Morland

HebammenWissen (4) 1/2023, S. 14-16

**Tabelle 1: Beispiele Wundverbände**

| Produkt                    | Alginat                                                                                                                                                                                                                           | Hydrogel                                                                                                                                                                      | Hydrocolloid                                                                                                                                                                                                 | Polyurethanschaum                                                                                                                                                               |
|----------------------------|-----------------------------------------------------------------------------------------------------------------------------------------------------------------------------------------------------------------------------------|-------------------------------------------------------------------------------------------------------------------------------------------------------------------------------|--------------------------------------------------------------------------------------------------------------------------------------------------------------------------------------------------------------|---------------------------------------------------------------------------------------------------------------------------------------------------------------------------------|
| <b>Eigenschaften</b>       | <ul style="list-style-type: none"> <li>• aus der Alge gewonnen</li> <li>• quillt auf</li> <li>• wandelt Flüssigkeit in Gel</li> <li>• blutstillend</li> <li>• zur Wundreinigung</li> <li>• Wundtamponade (Wundtaschen)</li> </ul> | <ul style="list-style-type: none"> <li>• transparentes Gel, aus gebundenem Wasser</li> <li>• granulationsfördernd</li> <li>• Fibrinlösung</li> <li>• feuchthaltend</li> </ul> | <ul style="list-style-type: none"> <li>• flüssigkeitsabsorbierend</li> <li>• Gel bildend</li> <li>• Granulationsfördernd</li> <li>• Schutz vor Austrocknung</li> <li>• Isolation und Abpolsterung</li> </ul> | <ul style="list-style-type: none"> <li>• gute Absorption durch aufquellen</li> <li>• Einschluss Keime</li> <li>• bei Kompressionstherapie geeignet</li> </ul>                   |
| <b>Wundheilungsstörung</b> | <ul style="list-style-type: none"> <li>• feuchte Beläge</li> <li>• mittel bis starke Exsudation</li> <li>• tiefe/ unterterminierte Wunden/ Wundtaschen</li> </ul>                                                                 | <ul style="list-style-type: none"> <li>• trockene Wunden</li> <li>• Fibrinbeläge</li> <li>• feuchthalten freiliegender Strukturen (Sehnen, Knochen)</li> </ul>                | <ul style="list-style-type: none"> <li>• flache, oberflächliche, Wunden mit wenig Exsudat</li> <li>• Blasenbildung</li> </ul>                                                                                | <ul style="list-style-type: none"> <li>• Mäßig bis stark sezernierende Wunde</li> <li>• oberflächliche Wunde - Primärverband</li> <li>• tiefe Wunde- Sekundärverband</li> </ul> |

Tabelle 1: Morland 2022 (zitiert nach Gräni (2014), Protz, Selmer, Hallern (2009); Mölnycke (2008) und Fleig (2006)
