# Supplementary material for: Gut versorgt nach Sectio
Source: Springer Nature journal article supplement (doi:10.1007/s43877-022-0724-7), 2023-01-01
Supplement: MOESM3 [file 23905348]

## Literatur

### zum Beitrag „Wundkontrolle, Wundheilung & Wundpflege“ von Bianca Morland

HebammenWissen (4) 1/2023, S. 14-16

Bryan C (2015) Sectio caesarea. In: CS Bryan, M Ehlen: Klinikstandards in der Geburtsmedizin. Georg Thieme Verlag, Stuttgart. S. 252-269

Büthe K (2020) Abdominale Geburt: Sectio caesarea. In: K. Büthe, C. Schwenger-Fink (Hrsg.): Evidenzbasierte Wochenbettpflege. Kohlhammer, Stuttgart. S. 70-75

Destatis (2021) Pressemitteilung Nr. N 018 vom 15. März 2021  
[https://www.destatis.de/DE/Presse/Pressemitteilungen/2021/03/PD21\\_N018\\_231.html](https://www.destatis.de/DE/Presse/Pressemitteilungen/2021/03/PD21_N018_231.html)

Ewering AK (2020) Bauchdeckenentspannende Positionierung. In: I Care Pflege. 2. Auflage, Georg Thieme Verlag, Stuttgart. S. 352

Fitzpatrick KE, Kurinczuk JJ, Alfirevic Z, Spark P, Brocklehurst P, Knight M (2012) Uterine rupture by intended mode of delivery in the UK: a national case-control study. PLoS Med 2012;9(3):e1001184. <https://pubmed.ncbi.nlm.nih.gov/22427745/>

Herber-Löffler A (2020) Betreuung nach einer Sectio caesarea. In: A. Stiefel, K. Brendel, N.H. Bauer (Hrsg.): Hebammenkunde. Georg Thieme Verlag, Stuttgart. S. 897

Herber-Löffler A, Stiefel A (2020): Hebammenkunde. Sectio caesarea. In: A. Stiefel, K. Brendel, N.H. Bauer (Hrsg.): Hebammenkunde. Georg Thieme Verlag, Stuttgart. S. 707-715

Lorenz R (2022) Wundheilungsphasen. Dr. Ausbüttel & Co. GmbH  
<https://www.draco.de/wundheilungsphasen/>

Piatek S, Tautenhahn J (2012) Physiologie der Wundheilung. In: H. Lippert: Wundatlas. 3. Vollständig überarbeitete Auflage, Georg Thieme Verlag, Stuttgart.

Protz K, Timm J H (2020) Wundmanagement. In: I Care Pflege. 2. Auflage, Georg Thieme Verlag, Stuttgart. S. 670-691

Robert Koch-Institut (RKI) (2018) Prävention postoperativer Wundinfektionen. Empfehlung der Kommission für Krankenhaushygiene und Infektionsprävention (KRINKO) beim Robert Koch-Institut.  
[https://www.rki.de/DE/Content/Infekt/Krankenhaushygiene/Kommission/Tabelle\\_Wundinf.html](https://www.rki.de/DE/Content/Infekt/Krankenhaushygiene/Kommission/Tabelle_Wundinf.html) (letzter Zugriff: 12.08.2022)

Schewior-Popp S, Sitzmann F, Ullrich L (Hrsg.) (2017) Ein Lehrbuch für Pflegende in Ausbildung. 13. Auflage. Thiemes Pflege. Stuttgart: Thieme-Verlag, Stuttgart

Skibbe X, Löseke A (2021) Gynäkologie und Geburtshilfe für die Pflege. 4. Auflage, Thieme-Verlag, Stuttgart

Voggenreiter G, Dold C (2009) Wundtherapie. Wunden professionell beurteilen und erfolgreich behandeln. 2. Überarbeitete Auflage. Georg Thieme Verlag, Stuttgart

Literatur/Tabelle:

Gräni NH (2014) Moderne Therapiemöglichkeiten. <https://www.doctors.today/a/moderne-therapiemoeglichkeiten-1662032>

Protz K, Sellmer W, v. Hallern B (2009) Wunde einfach-praktisch. BvH, Verlag für Med. Publ., Stade

Mölnlycke Health Care HmbH (Hrsg.) (2008): Leitfaden Wundversorgung.  
<https://www.molnlycke.de/neuigkeiten-events/neuigkeiten/wundversorgung-einfach-machen>

Fleig W E (2006) Wundfibel. Hrsg. Universitätsklinikum Leipzig AöR, Universitätsklinikum Leipzig
